# Supplementary material for: Prognostic and immunological potential of AC012236.1/hsa-miR-30d-5p ceRNA AVEN by integrated analysis of single-cell and bulk RNA-seq in lung adenocarcinoma
Source: Research Square preprint supplement (doi:10.21203/rs.3.rs-5071092/v1), 2025-11-01
Supplement: Supplementary file 1 [file 15384f22e4abb3110619207c.pdf]

Supplementary figure 1 The original image of the Western blot experiments.

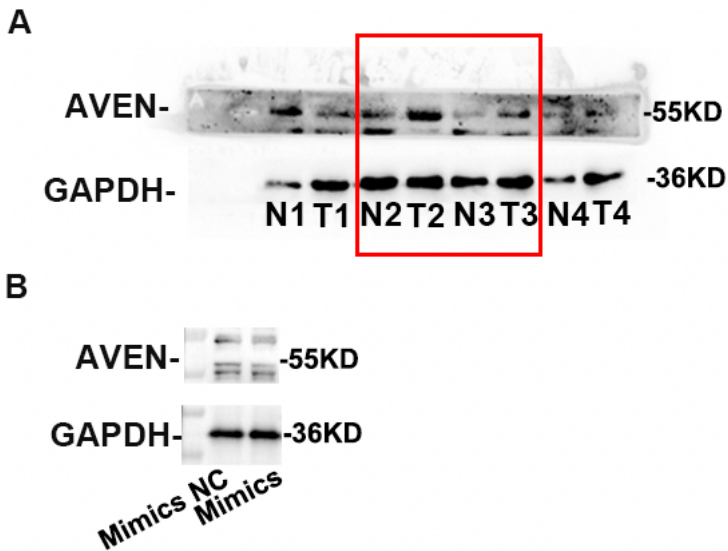

Supplementary figure 1 The original image of the Western blot experiments. (A) The original image of the Western blot experiments in figure 2E. The bands within the red box were presented in figure 2E. (B) The original image of the Western blot experiments in figure 16E.
